# Supplementary material for: Quantitative Analysis of Adventitious Root Growth Phenotypes in Carnation Stem Cuttings
Source: PubMed Central journal article supplement (PMC4521831; doi:10.1371/journal.pone.0133123), 2015-07-31
Supplement: pone.0133123.s010.pdf [file pone.0133123.s010.pdf]

**Table S3.- Principal component analysis of root system parameters in carnation stem cuttings grown in soil plugs**

3A.- Principal component analysis

| Principal component | Eigenvalue | Variance |
|---------------------|------------|----------|
| 1                   | 5.0565     | 56.183   |
| 2                   | 1.6777     | 18.641   |
| 3                   | 1.2076     | 13.418   |
| 4                   | 0.4855     | 5.394    |
| 5                   | 0.3170     | 3.522    |
| 6                   | 0.1392     | 1.546    |
| 7                   | 0.0978     | 1.086    |
| 8                   | 0.0112     | 0.125    |

3B.- Eigenvectors for the three main principal components (PCs)

| Parameters | PC1      | PC2       | PC3       |
|------------|----------|-----------|-----------|
| CW         | 0.345265 | -0.319970 | -0.131645 |
| logCP      | 0.368628 | -0.287599 | -0.297825 |
| logCA      | 0.345895 | -0.370170 | 0.263357  |
| CCA        | 0.360629 | -0.392486 | -0.097157 |
| logALS     | 0.016021 | -0.152633 | 0.885513  |
| ARD        | 0.317331 | 0.201794  | 0.164968  |
| RA         | 0.366201 | 0.406235  | 0.030007  |
| CRA        | 0.362496 | 0.348536  | 0.053740  |
| RP         | 0.358813 | 0.416310  | 0.006068  |
